# Supplementary material for: The role of grain boundary character in solute segregation and thermal stability of nanocrystalline Pt–Au
Source: Royal Society of Chemistry journal article supplement (doi:10.1039/d0nr07180c), 2021-01-01
Supplement: d0nr07180c3.pdf [file d0nr07180c3.pdf]

## **The role of grain boundary character in solute segregation and thermal stability of nanocrystalline Pt-Au**

### **Electronic supplementary information**

Christopher M. Barr<sup>1</sup>, Stephen M. Foiles<sup>1</sup>, Malek Alkayyali<sup>2</sup>, Yasir Mahmood<sup>2</sup>, Patrick M. Price<sup>1</sup>, David P. Adams<sup>1</sup>, Brad L. Boyce<sup>1</sup>, Fadi Abdeljawad<sup>2,3,\*</sup>, Khalid Hattar<sup>1,\*</sup>

1) Material, Physical, and Chemical Sciences Center, Sandia National Laboratories, Albuquerque, New Mexico, 87185, USA

2) Department of Mechanical Engineering, Clemson University, Clemson, South Carolina, 29634, USA

3) Department of Materials Science and Engineering, Clemson University, Clemson, South Carolina, 29634, USA

#### **Caption for the video titled: "Atomistic\_simulations\_MC-MD\_thermal\_anneal.mp4"**

A video depicting hybrid Monte Carlo-Molecular Dynamics thermal annealing simulation of a polycrystalline Pt-Au system at 500C. Atoms within each crystalline grain are assigned a unique color (red, blue, white in all tones) and Au atoms are shown in gold. Segregation of Au to Pt grain boundaries can be seen along with Au phase separation within Pt grains.
